# Supplementary material for: Particle swarm optimization framework for Parkinson’s disease prediction
Source: PeerJ Comput Sci. 2025 Sep 11;11:e3135. doi: 10.7717/peerj-cs.3135 (PMC12453757; doi:10.7717/peerj-cs.3135)
Supplement: Supplemental Information 9 [file peerj-cs-11-3135-s009.docx]

| **Parameter** | **Symbol** | **Parameter Value** |
| --- | --- | --- |
| **No. of particles** | *Psize* | ***Psize∈ [10…40] Particles*** |
| **Maximum velocity** | *Vmax* | ***Vmax = 0.2*** |
| **Minimum velocity** | *Vmin* | ***Vmin= - Vmax*** |
| **Inertia weight** | *w* | ***w= ((Tmax - G) * (0.9 - 0.4) / Tmax) + 0.4*** |
| **First acceleration parameter** | *c1* | ***c1∈ [0.5,2]*** |
| **Second acceleration parameter** | *c2* | ***c2=c1  or c1+c2≤ 4*** |
| **Diversity of the population maintenance** | *r1,r2* | ***r1,r2∈ [0,1]*** |
| **Iteration** | ***Tmax*** | ***Tmax ≤ 30000*** |
